# Supplementary material for: Reliability Assessment of Metal Quantification in Formalin-fixed, Paraffin-embedded Human Liver Tissue for Studying Liver Diseases
Source: Research Square preprint supplement (doi:10.21203/rs.3.rs-9878473/v1), 2026-06-02
Supplement: Supplementary file 1 [file c494d5f7cb412dd61ef58b24.docx]

**SUPPLEMENTAL DATA AND MATERIALS**

**Reliability Assessment of Metal Quantification in Formalin-fixed, Paraffin-embedded Human Liver Tissue for Studying Liver Diseases**

**Authors:** Nivisa Vakeesan1, Jason Xu2, Jamie Roberman3,4,5, Li Tao1, Yang Jiang1, Amanda Vitale7, Andrea E. Cassidy-Bushrow3,4,6, Lu Cai2, Wanqing Liu1,8*

**Affiliations:**

1Department of Pharmaceutical Sciences, Eugene Applebaum College of Pharmacy and Health Sciences, Wayne State University, Detroit, MI, USA;

2Department of Pediatrics, Pediatric Research Institute, University of Louisville, KY, USA;

3Department of Public Health Sciences, Henry Ford Health, Detroit, MI, USA;

4Henry Ford Health + Michigan State University Health Sciences, Detroit, MI, USA;

5Department of Epidemiology & Biostatistics, Michigan State University College of Human Medicine, East Lansing, MI, USA;

6Department of Pediatrics and Human Development, College of Human Medicine, Michigan State University, East Lansing, MI, USA;

7Department of Pathology, Henry Ford Hospital, Detroit, MI, USA;

8Department of Pharmacology, School of Medicine, Wayne State University, Detroit, MI, USA

*Corresponding author: Wanqing Liu, PhD. 6135 Woodward Ave, Detroit, MI 48202. wliu@wayne.edu; Tel.: 1-313-577-3375.Supplementary Tables and Figures


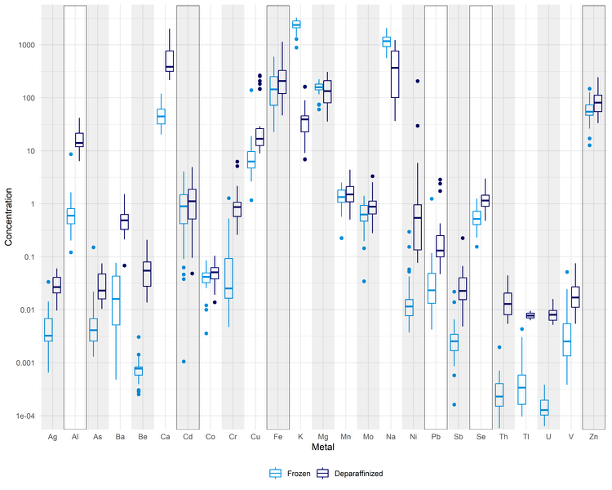
Figure S1: Boxplots for the concentrations of the metals quantified within the study. The frozen samples are in light blue and the FFPE (Deparaffinized) samples are in dark blue. Outliers are noted as individual dots. The boxed metals are the metals with a Pearson correlation value over 0.6 between frozen and FFPE sample pairs.


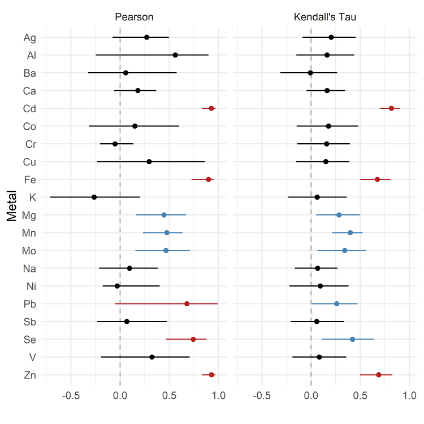


Figure S2: Forest plots of the metal correlation values when assessing correlation between frozen and FFPE samples utilizing Pearson correlation and Kendall’s Tau. Red indicates a high correlation estimate (over 0.6) while blue denotes a significantly positive correlation (the interval does not cross 0) but it is not a high estimate. Metals with more than 10 below quantifiable levels readings for either frozen or FFPE sample types were removed from this analysis.


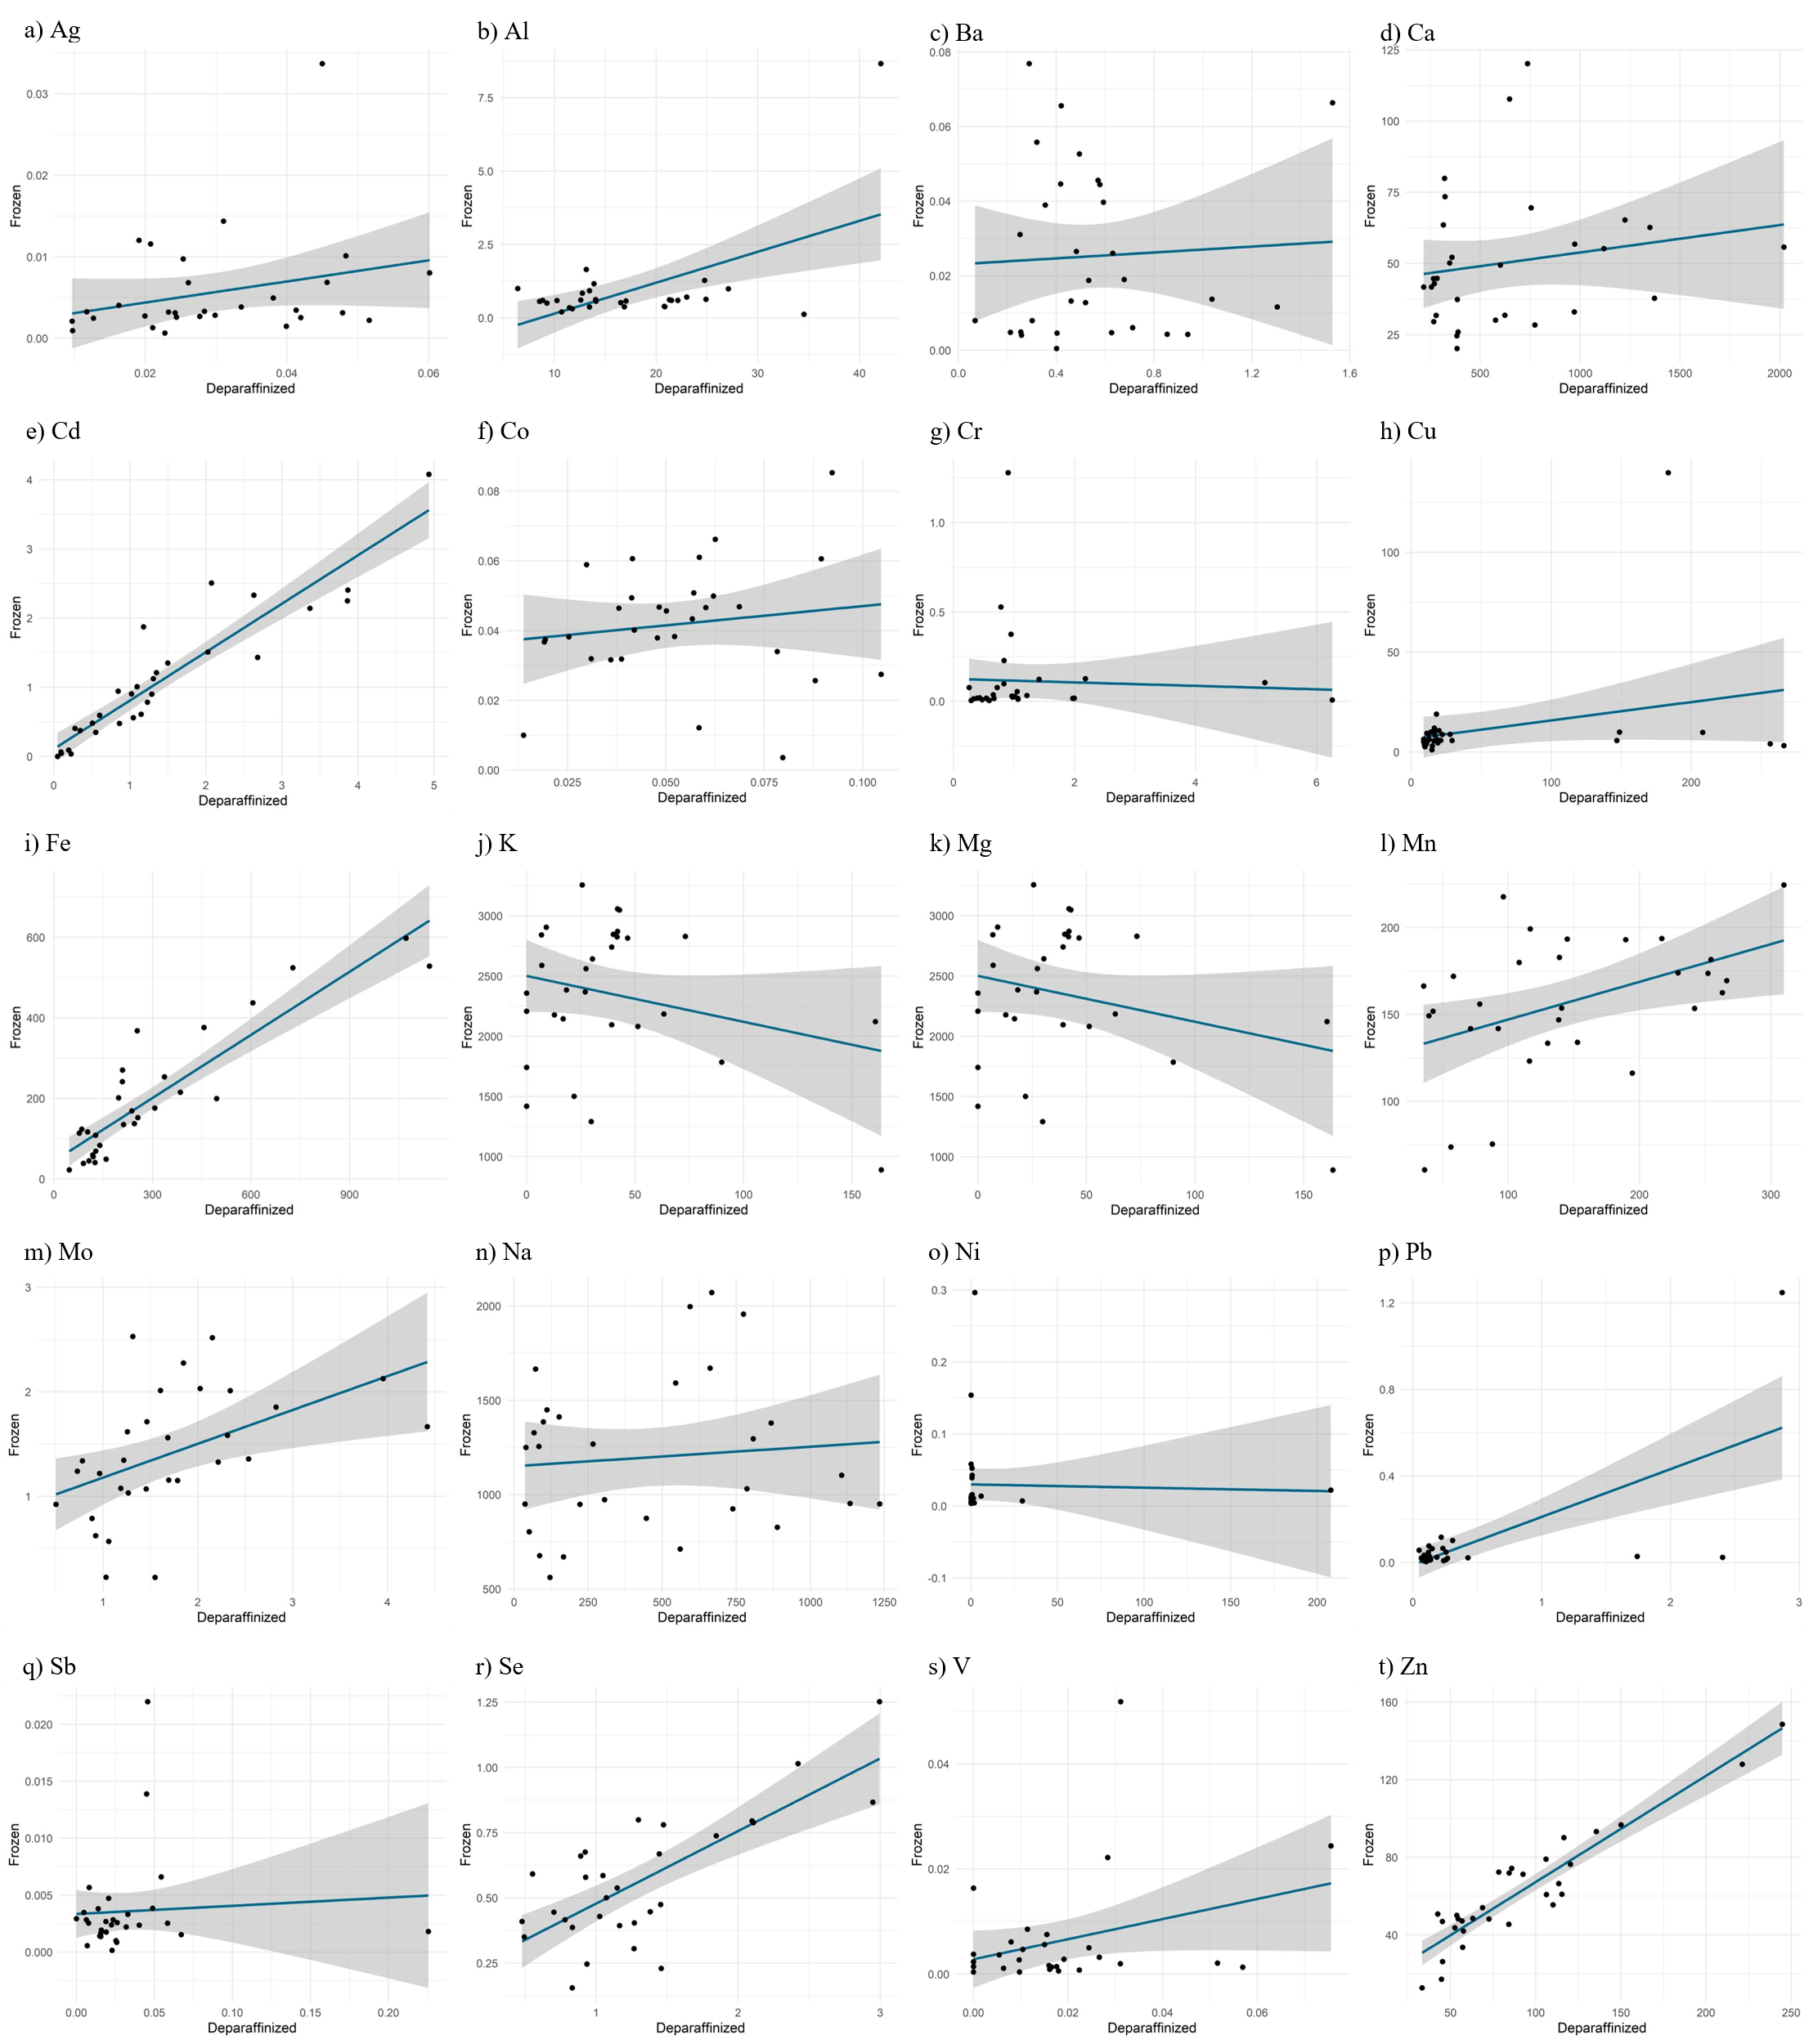


Figure S3: Correlation plots of all the metals analyzed by Pearson correlation and Kendall’s Tau. The following metals are presented: a) Silver (Ag), b) aluminum (Al), c) barium (Ba), d) calcium (Ca), e) cadmium (Cd), f) cobalt (Co), g) chromium (Cr), h) copper (Cu), i) iron (Fe), j) potassium (K), k) magnesium (Mg), l) manganese (Mn), m) molybdenum (Mo), n) sodium (Na), o) nickel (Ni), p) lead (Pb), q) antimony (Sb), r) selenium (Se), s) vanadium (V), t) zinc (Zn). The x and y axes units are in ng/mm3 which is from the concentration of each metal in the respective sample type per sample.

| **Characteristic** | **CHTN N = 19** | **NICHD N = 11** | **Overall N = 30** |
| --- | --- | --- | --- |
| Race (n (%)) |  |  |  |
| White | 13 (68.4%) | 8 (72.7%) | 21 (70.0%) |
| Black | 3 (15.8%) | 3 (27.3%) | 6 (20.0%) |
| Other | 1 (5.3%) | 0 (0.0%) | 1 (3.3%) |
| Unknown | 2 (10.5%) | 0 (0.0%) | 2 (6.7%) |
| Biological Sex (n (%)) |  |  |  |
| Female | 16 (84.2%) | 3 (27.3%) | 19 (63.3%) |
| Male | 2 (10.5%) | 8 (72.7%) | 10 (33.3%) |
| Unknown | 1 (5.3%) | 0 (0.0%) | 1 (3.3%) |
| Age (years) |  |  |  |
| Mean (SD) | 48.1 (19.6) | 27.9 (9.4) | 40.4 (19.1) |
| Min - Max | 3.0 - 79.0 | 10.4 - 41.9 | 3.0 - 79.0 |
| Median (Q1, Q3) | 46.5 (38.0, 64.0) | 28.6 (24.3, 34.5) | 38.0 (28.6, 52.0) |

Table S1: Overview of demographic information of the samples utilized in this study. Samples were either from Cooperative Human Tissue Network (CHTN) or National Institute of Child Health and Human Development (NICHD) Brain and Tissue Bank for Developmental Disorders.

| **Metal** | **Sample Type** | **White (median(min, max))** | **Non-White (median(min, max))** | **Race p value** | **Male (median(min, max))** | **Female (median(min, max))** | **Biological sex p value** | **Age Kendall's Tau** |
| --- | --- | --- | --- | --- | --- | --- | --- | --- |
| Ag | Frozen | 0.00 (0.00, 0.03) | 0.00 (0.00, 0.01) | 0.46 | 0.00 (0.00, 0.03) | 0.00 (0.00, 0.01) | 0.41 | -0.04 |
| Al | Frozen | 0.56 (0.20, 8.66) | 0.64 (0.12, 1.65) | 0.35 | 0.48 (0.12, 1.65) | 0.61 (0.35, 8.66) | 0.10 | 0.02 |
| Ba | Frozen | 0.01 (0.00, 0.08) | 0.02 (0.00, 0.07) | 0.97 | 0.01 (0.00, 0.07) | 0.03 (0.00, 0.08) | 0.29 | 0.27 |
| Ca | Frozen | 41.73 (20.16, 120.19) | 56.80 (25.93, 79.90) | 0.38 | 47.43 (20.16, 79.90) | 44.82 (28.43, 120.19) | 0.62 | 0.11 |
| Cd | Frozen | 0.79 (0.04, 4.08) | 1.35 (0.00, 2.33) | 0.40 | 0.44 (0.00, 2.25) | 0.94 (0.04, 4.08) | 0.20 | 0.25 |
| Co | Frozen | 0.04 (0.00, 0.09) | 0.05 (0.01, 0.07) | 0.11 | 0.03 (0.01, 0.06) | 0.05 (0.00, 0.09) | 0.07 | 0.13 |
| Cr | Frozen | 0.02 (0.01, 1.28) | 0.05 (0.00, 0.38) | 0.16 | 0.02 (0.00, 1.28) | 0.03 (0.01, 0.38) | 0.12 | 0.14 |
| Cu | Frozen | 6.17 (1.17, 139.86) | 5.97 (3.10, 10.02) | 0.47 | 6.14 (3.10, 139.86) | 6.17 (1.17, 11.99) | 0.87 | -0.01 |
| Fe | Frozen | 152.29 (40.98, 597.93) | 199.55 (22.64, 524.45) | 0.53 | 129.30 (40.98, 597.93) | 176.12 (22.64, 528.61) | 0.88 | 0.16 |
| K | Frozen | 2561.86 (890.58, 3287.77) | 2246.41 (1292.28, 2905.43) | 0.47 | 2363.83 (890.58, 3257.18) | 2561.86 (1419.10, 3287.77) | 0.62 | 0.17 |
| Mg | Frozen | 162.55 (60.55, 224.55) | 156.76 (75.43, 217.75) | 0.30 | 150.54 (60.55, 224.55) | 169.49 (73.65, 217.75) | 0.44 | 0.18 |
| Mn | Frozen | 1.22 (0.22, 2.43) | 1.85 (0.57, 2.53) | 0.03 | 1.16 (0.23, 1.67) | 1.56 (0.22, 2.53) | 0.10 | 0.10 |
| Mo | Frozen | 0.58 (0.03, 1.35) | 0.76 (0.20, 1.41) | 0.30 | 0.54 (0.14, 1.25) | 0.79 (0.03, 1.41) | 0.32 | 0.11 |
| Na | Frozen | 972.93 (561.25, 1996.67) | 1379.59 (676.49, 2071.61) | 0.36 | 1037.97 (561.25, 2071.61) | 1226.76 (670.49, 1996.67) | 0.51 | 0.06 |
| Ni | Frozen | 0.01 (0.00, 0.30) | 0.02 (0.00, 0.15) | 0.09 | 0.01 (0.00, 0.30) | 0.01 (0.01, 0.04) | 0.28 | -0.08 |
| Pb | Frozen | 0.02 (0.00, 1.25) | 0.03 (0.01, 0.07) | 0.83 | 0.02 (0.01, 1.25) | 0.02 (0.00, 0.12) | 0.41 | 0.10 |
| Sb | Frozen | 0.00 (0.00, 0.02) | 0.00 (0.00, 0.00) | 0.42 | 0.00 (0.00, 0.02) | 0.00 (0.00, 0.01) | 0.92 | 0.08 |
| Se | Frozen | 0.54 (0.23, 1.25) | 0.43 (0.16, 0.80) | 0.58 | 0.49 (0.16, 1.01) | 0.58 (0.23, 1.25) | 0.40 | 0.13 |
| V | Frozen | 0.00 (0.00, 0.02) | 0.00 (0.00, 0.05) | 0.32 | 0.00 (0.00, 0.02) | 0.00 (0.00, 0.05) | 0.27 | 0.10 |
| Zn | Frozen | 54.08 (12.73, 148.57) | 60.78 (17.16, 107.12) | 0.83 | 47.62 (17.16, 79.05) | 71.27 (12.73, 148.57) | 0.07 | 0.41 |

Table S2: Demographics analysis for frozen samples utilized within the study. Median (minimum (min), maximum (max)) concentration values for the two racial and biological sex groups are presented. Respective p values (without adjustment for multiple comparisons) for race and biological sex differences assessed by Mann Whitney U are also presented. Correlation analysis for age was performed utilizing Kendall’s Tau. Metals that had more than 10 below quantifiable levels values for either frozen or FFPE samples were removed.

| **Parameter** | **Setting** |
| --- | --- |
| **Forward power** | 1600w |
| **Detection mode** | He |
| **Number of replicas** | 3 |
| **Measurement time (s)** | 1 for trace metals, 0.1 for Na, K, Ca, Mg and Fe |
| **Operation Conditions** | |
| **Plasma mode** | HMI |
| **Extract 2** | -200V |
| **Omega Bisa** | -80V |
| **Omega Lens** | 9.2V |
| **He flow** | 5ml/min |
| **OctP RF** | 200V |
| **RF Power** | 1600 w |
| **Auxiliary gas flow** | 0.9L/min |
| **Plasma gas** | 15.0 L/min |
| **Sample introduction** | PeriPump |
| **Replicates** | 3 |

Table S3: Settings and operation conditions for inductively coupled plasma mass spectrometry (ICP-MS) utilized for the quantification of metals of all samples in this study.
